# Supplementary material for: Authenticity affects the recognition of emotions in speech: behavioral and fMRI evidence
Source: PubMed Central journal article supplement — Cogn Affect Behav Neurosci. 2011 Oct 29;12(1):140–50. doi: 10.3758/s13415-011-0069-3 (PMC3267031; doi:10.3758/s13415-011-0069-3), 2011-10-29
Supplement: 13415_2011_69_MOESM1_ESM.pdf [file 13415_2011_69_MOESM1_ESM.pdf]

### Supplement 1a: Estimates for Emotion Trials with Authenticity

| Fixed Effect |         | logit | Std. Error | z value   |
|--------------|---------|-------|------------|-----------|
| Authentic    | Anger   | -0,44 | 0,17       | -2,59 **  |
|              | Fear    | -1,20 | 0,21       | -3,55 *** |
|              | Joy     | -1,00 | 0,21       | -2,68 **  |
|              | Sadness | 0,41  | 0,20       | 4,23 ***  |
| Play-Acted   | Anger   | 0,41  | 0,20       | 4,23 ***  |
|              | Fear    | -1,15 | 0,30       | -2,63 **  |
|              | Joy     | -0,93 | 0,30       | -2,65 **  |
|              | Sadness | -0,19 | 0,28       | -5,12 *** |

Values from the Generalized Linear Mixed Model fit by the Laplace approximation.

(\* =  $p < 0.05$ ; \*\* =  $p < 0.01$ ; \*\*\* =  $p < 0.001$ )

Formula: Correctness ~ Emotion \* Authenticity + (1 | Subject)

### Supplement 1b: Estimates for Emotion Trials without Authenticity

| Fixed Effect | logit | Std. Error | z value   |
|--------------|-------|------------|-----------|
| Anger        | -0,02 | 0,13       | -0,12     |
| Fear         | -1,17 | 0,15       | -7,72 *** |
| Joy          | -0,97 | 0,15       | -6,51 *** |
| Sadness      | 0,11  | 0,14       | 0,88      |

Values from the Generalized Linear Mixed Model fit by the Laplace approximation.

(\* =  $p < 0.05$ ; \*\* =  $p < 0.01$ ; \*\*\* =  $p < 0.001$ )

Formula: Correctness ~ Emotion + (1 | Subject)

### Supplement 1c: ANOVA of Model Fit for Emotion Trials

| Model | Df | AIC     | BIC     | logLik   | Chisq | Df    |
|-------|----|---------|---------|----------|-------|-------|
| f2    | 5  | 2168,20 | 2195,50 | -1079,10 |       |       |
| f1    | 9  | 2148,90 | 2198,00 | -1065,40 | 27,31 | 4 *** |

Values for goodness of fit of models compared. (\* =  $p < 0.05$ ; \*\* =  $p < 0.01$ ; \*\*\* =  $p < 0.001$ )

f1: Correctness ~ Emotion \* Authenticity + (1 | Subject)

f2: Correctness ~ Emotion + (1 | Subject)

### Supplement 2a: Estimates for Authenticity Trials with Emotion

| Fixed Effect |         | logit | Std. Error | z value |
|--------------|---------|-------|------------|---------|
| Authentic    | Anger   | 0,88  | 0,27       | 3,29 ** |
|              | Fear    | 1,07  | 0,24       | 0,83    |
|              | Joy     | 0,80  | 0,23       | -0,33   |
|              | Sadness | 0,67  | 0,23       | -0,94   |
| Play-Acted   | Anger   | 0,91  | 0,23       | 0,13    |
|              | Fear    | 0,51  | 0,32       | -1,84   |
|              | Joy     | 0,72  | 0,32       | -0,34   |
|              | Sadness | 0,26  | 0,32       | -1,39   |

Values from the Generalized Linear Mixed Model fit by the Laplace approximation.

(\* =  $p < 0.05$ ; \*\* =  $p < 0.01$ ; \*\*\* =  $p < 0.001$ )

Formula: Correctness ~ Emotion \* Authenticity + (1 | Subject)

### Supplement 2b: Estimates for Authenticity Trials without Emotion

| Fixed Effect | logit | Std. Error | z value  |
|--------------|-------|------------|----------|
| Authentic    | 0,85  | 0,23       | 3,78 *** |
| Play-Acted   | 0,59  | 0,11       | -2,34 *  |

Values from the Generalized Linear Mixed Model fit by the Laplace approximation.

(\* =  $p < 0.05$ ; \*\* =  $p < 0.01$ ; \*\*\* =  $p < 0.001$ )

Formula: Correctness ~ Authenticity + (1 | Subject)

### Supplement 2c: ANOVA of Model Fit for Authenticity Trials

| Model | Df | AIC     | BIC     | logLik  | Chisq | Df  |
|-------|----|---------|---------|---------|-------|-----|
| f2    | 3  | 1969,93 | 1986,30 | -981,97 |       |     |
| f1    | 9  | 1968,90 | 2017,99 | -975,45 | 13,03 | 6 * |

Values for goodness of fit of models compared. (\* =  $p < 0.05$ ; \*\* =  $p < 0.01$ ; \*\*\* =  $p < 0.001$ )

f2: Correctness ~ Authenticity + (1 | Subject)

f1: Correctness ~ Emotion \* Authenticity + (1 | Subject)

## Parametric Contrast of Reaction Time

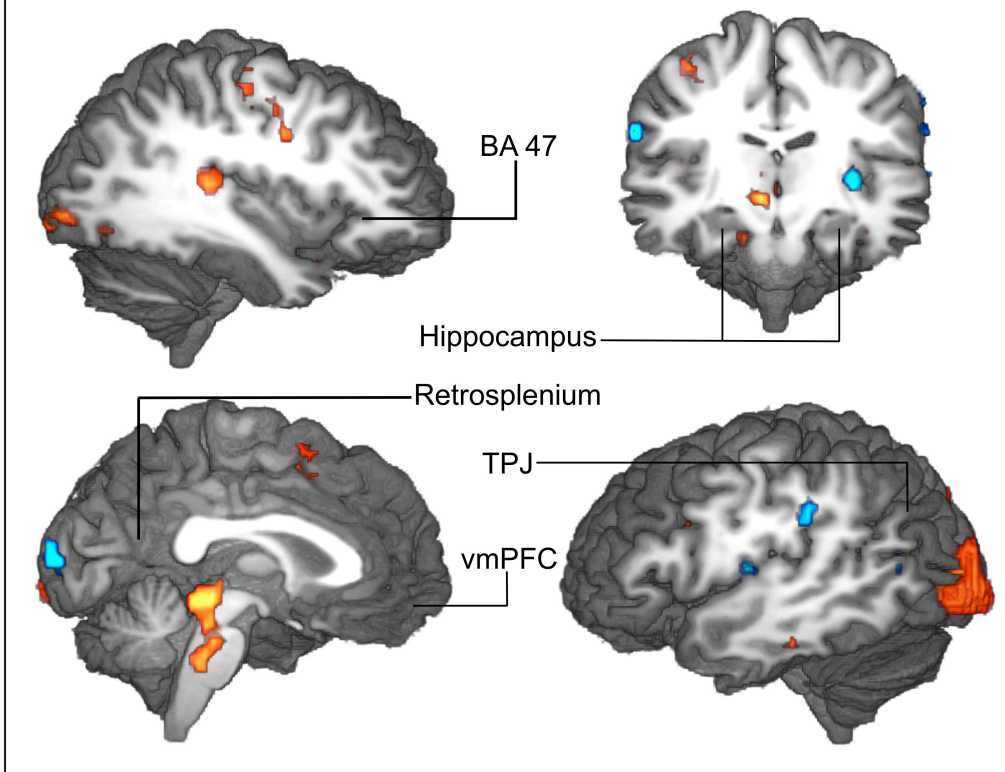

Supplement 3. Parametric brain activation correlates of reaction time regressor (of no interest) with network from task-based contrast (labelled). Group-averaged ( $n = 24$ ) statistical maps of significantly activated areas. False-positive correction by voxel-wise z-threshold set to  $Z = 2.33$  ( $p = 0.01$ ) with minimum activation area of  $270 \text{ mm}^3$  and mapped onto the best subject average 3D anatomical map. Top left: right view sagittal section; top right: anterior view coronal section; bottom left: right view sagittal section. Bottom right: left view sagittal section. TPJ = temporoparietal junction; vmPFC = ventromedial prefrontal cortex.

## Parametric Contrast of Speaker Repetition

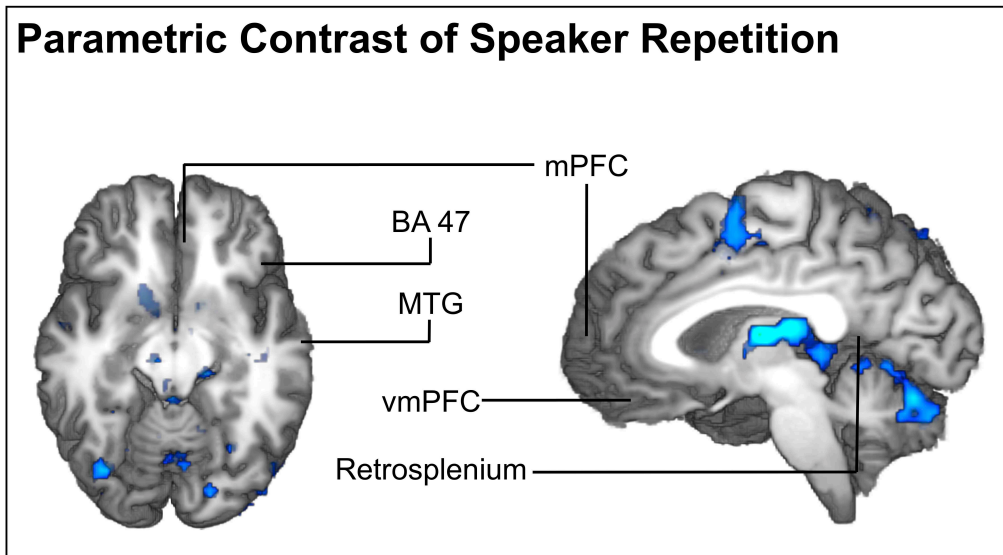

Supplement 4. Parametric brain activation correlates of speaker repetition regressor (of no interest) with network from stimulus-based contrast (labelled). Group-averaged ( $n = 24$ ) statistical maps of significantly activated areas. False-positive correction by voxel-wise  $z$ -threshold set to  $Z = 2.33$  ( $p = 0.01$ ) with minimum activation area of  $270 \text{ mm}^3$  and mapped onto best subject average 3D anatomical map. Left: ventral view axial section through temporal lobes. Middle: left view sagittal section through corpus callosum. Right: left view sagittal section through corpus callosum. MTG = middle temporal gyrus; vmPFC = ventromedial prefrontal cortex; mPFC = medial prefrontal cortex.

Supplement 5. Sample transcripts of original radio recordings

| Emotion | Context                                                                                                                                                                                                                                                                                                                                 | Original Transcript                                                                                                                                                                                                                              | Transcript Translation                                                                                                                                                                                                   | Gender |
|---------|-----------------------------------------------------------------------------------------------------------------------------------------------------------------------------------------------------------------------------------------------------------------------------------------------------------------------------------------|--------------------------------------------------------------------------------------------------------------------------------------------------------------------------------------------------------------------------------------------------|--------------------------------------------------------------------------------------------------------------------------------------------------------------------------------------------------------------------------|--------|
| Anger   | Two fighting dogs bit to death 6-year-old V. in the schoolyard. Fighting dogs are a big problem in the area and people do not feel protected by the police. The people are shouting at a police officer, blaming him for being too late.                                                                                                | Der Kiosk ruft vor Viertelstund an, "nach Viertelstund" kommt ihr erst, oder was?"                                                                                                                                                               | The kiosk called 15 minutes ago, you only come "after 15 minutes" or what?                                                                                                                                               | Male   |
| Fear    | The hundred year flood at the Oder threatens whole villages. The water is rising and an inhabitant of an especially low-lying house reports her fears.                                                                                                                                                                                  | Grade unser Haus liegt ziemlich tief. Also 1947 stand das Wasser da schon "bis zum Fensterkreuz". Und wenn das noch schlimmer werden sollte, schätz ich, dass das Haus bald gar nicht mehr zu sehen ist im Wasser. Ja, ich hab ganz doller Angst | Especially our house lies pretty low. Well, 1947 the water was already up to the window crossbar. And if it should get worse, I guess, that the house won't be visible anymore in the water. Yes, I am very much afraid. | Female |
| Joy     | A married couple has won a new car in the lottery. They report what trick they used to get their ticket on top for the drawing.                                                                                                                                                                                                         | Ja. "Mein Mann wollte schon immer im Anfang" der ganzen Sache die 5 Mark einzahlen. Ich schob das ja immer noch n Bischn hinaus. Eben n kleiner Schnack, ne.                                                                                     | Yes. "My husband already at the beginning" of the whole thing wanted to pay the 5 Mark. Well, I always delayed that a bit. Just a little joke, huh.                                                                      | Female |
| Sadness | In a school massacre, R. killed 16 people before killing himself. One of the victims was the spouse of E. One year after the gun rampage he reports on how he lives with the loss of his spouse. It is still difficult for him to accept her death. Besides his grief, he also felt a heavy pain about the helplessness of his friends. | Und sie sitzen da plötzlich in Tränen "und alles lacht", oder ist dann plötzlich sprachlos, weil das dann passiert und sie das einfach nicht steuern können.                                                                                     | And you are sitting there in tears "and everybody laughs" or are speechless, because it just hap-pened and you are not able to control it.                                                                               | Male   |

The segments of transcripts used as stimuli are indicated by quotation marks.
